# Supplementary material for: Study of a charge transition-driven resistive switching mechanism in TiO2-based random access memory via density functional theory
Source: Royal Society of Chemistry journal article supplement (doi:10.1039/d3nr06614b), 2024-01-01
Supplement: d3nr06614b1.pdf [file d3nr06614b1.pdf]

## Supplementary Information

### Study of Charge Transition-Driven Resistive Switching Mechanism in TiO<sub>2</sub>-based Random Access Memory via Density Functional Theory

Taeyoung Jeong<sup>1,2</sup>, In Won Yeu<sup>1</sup>, Kun Hee Ye<sup>1,2</sup>, Seungjae Yoon<sup>1,2</sup>, Dohyun Kim<sup>1,2</sup>, Cheol  
Seong Hwang<sup>\*,2</sup>, and Jung-Hae Choi<sup>\*,1</sup>

<sup>1</sup>*Electronic Materials Research Center, Korea Institute of Science and Technology, Seoul 02792, Korea*

<sup>2</sup>*Department of Materials Science and Engineering and Inter-University Semiconductor Research Center, Seoul  
National University, Seoul 08826, Korea*

*\*Corresponding author;*

*Tel.: +82 2 880 7535. Fax: +82 2 884 1413*

*E-mail address: cheolsh@snu.ac.kr (C. S. Hwang)*

*Tel.: +82 2 958 5488. Fax: +82 2 958 6658*

*E-mail address: choijh@kist.re.kr (J.-H. Choi)*

## Supplementary note 1

### Methodology to determine the ION of each $V_O$

This supplementary note describes the approach for estimating the individual oxidation number (ION) of an oxygen vacancy ( $V_O$ ) using Bader charge (BC) distribution. This approach is based on the observation that the charge of an oxygen vacancy ( $V_O$ ) is highly localized onto the three neighboring Ti ions. Fig. S2a-c show the BC distributions of Ti ions in the presence of an isolated  $V_O$  with ION of 0, +1, and +2, respectively, where x-axes indicate Ti ions in the  $3 \times 3 \times 6$  rutile  $TiO_2$  supercell. The Ti ions with coordination numbers (CNs) of 5 and 6 correspond to the neighboring and non-neighboring Ti ions to  $V_O$ , respectively. The green dashed lines represent the average BC value of the 6-coordinated Ti ions in each case, while the red dashed lines indicate the average BC value of the Ti ions in a perfect cell for comparison. Note that the BC values of three 5-coordinated Ti ions significantly changed by both the presence of  $V_O$  and its charge state, while those of the other 6-coordinated Ti ions remained unvaried, clearly showing the strong charge localization nature of  $V_O$  in rutile  $TiO_2$ . Therefore, the BC value of neighboring Ti ions can be used for estimating the ION of  $V_O$ .

Two key parameters were chosen for estimating the IONs of  $V_O$ s in arbitrary configuration: (1)  $\Sigma BC$ , defined as the sum of BC values of three neighboring Ti ions surrounding a certain  $V_O$ . This parameter quantifies the extent to which the electrons of the  $V_O$  are localized to the three neighboring Ti ions, with a lower  $\Sigma BC$  value indicating more localized electrons. (2) CNs of the three neighboring Ti ions. As described in Section A of the main text, the charge localization effect of the Ti ion varies according to its CN. Hence,  $V_O$ s were classified into three cases according to the CNs of the three neighboring Ti ions: *CN555* case when all three Ti ions are 5-coordinated; *CN455* case when one of the neighboring Ti ions is 4-coordinated, while the

other two are 5-coordinated; *CN445* case when two of the neighboring Ti ions are 4-coordinated, and the other is 4-coordinated. The other possibilities, such as the *CN444* case, where all three Ti ions are 4-coordinated, were neglected as they did not occur in this study. In the remainder of this note, the  $\Sigma$ BBC to ION relationship for each case will be established, and these relationships will be applied to explain the resistive switching process, as described in Section C of the main text.

### 1. $\Sigma$ BBC to ION relationship for *CN555*

A supercell containing an isolated  $V_O$ , as shown in Fig. S2d, is the most straightforward system of *CN555*. In this system, the ION of  $V_O$  is the same as the total charge of the supercell. The  $\Sigma$ BBC values for an isolated  $V_O^0$ ,  $V_O^{1+}$ , and  $V_O^{2+}$  were calculated using the BC distributions in Fig. S2a-c and are represented by the black squares in Fig. S2e. Notably, the  $\Sigma$ BBC and ION exhibited a nearly linear relationship. To validate this relationship, the  $\Sigma$ BBC was additionally calculated for an isolated  $V_O^{0.5+}$  and  $V_O^{1.5+}$ , as represented by the open squares in Fig. S2e. They aligned well with the linear relationship between  $\Sigma$ BBC and ION, meaning that the ION of an isolated  $V_O$  can be estimated by this  $\Sigma$ BBC to ION relationship.

However, to achieve the goal, this  $\Sigma$ BBC to ION relationship should be applied to arbitrary  $V_O$ s (multiple  $V_O$ s contained in a supercell) in the *CN555* case, as well as an isolated  $V_O$ . The colored squares in Fig. S2e show the  $\Sigma$ BBC to ION relationship when two  $V_O$ s exist at a distance of 4.42 Å or more (see the legend) in a supercell. For distances closer than 4.42 Å, a 4-coordinated Ti ion is formed, addressed in the next section. The two  $V_O$ -sites in a supercell are equivalent, irrespective of the distance between the two  $V_O$ s since all O-sites in rutile are

equivalent. Hence, the IONs of the two  $V_O$ s are equal to half of the total charge of the supercell. It should be noted that, compared to the  $\Sigma BC$  to ION relationship for an isolated  $V_O$  (black squares), the relationship remains consistent regardless of the presence of another adjacent  $V_O$  and its location. This finding means that the  $\Sigma BC$  value is hardly affected by other nearby  $V_O$ , and this characteristic is confirmed by the electron cloud diagram. Fig. S2f shows electron clouds for two  $V_O^0$ s separated by 4.42 Å. Despite the proximity between the two  $V_O^0$ s, the electron clouds remain intact compared to the electron cloud for an isolated  $V_O^0$ , shown in Fig. S2d. This independence of electron clouds is due to the highly localized nature of electrons of  $V_O$  to the neighboring Ti ions, ensuring the applicability of the  $\Sigma BC$  to ION relationship in Fig. S2e to arbitrary  $V_O$  in the *CN555* case.

## 2. $\Sigma BC$ to ION relationship for *CN455* and *CN445*

Fig. S3a and b show  $V_O$  configurations used to examine the  $\Sigma BC$  to ION relationship for *CN455* and *CN445* cases, respectively. The symmetrically equivalent  $V_O$ -sites in these supercells enable the calculation of the ION of  $V_O$  by dividing the total charge of the supercell by the number of  $V_O$ . These are the only ones allowing ION calculation for  $V_O$ s in *CN455* and *CN445* cases, as  $V_O$ -sites in other configurations are not equivalent. Fig. S4a-c and S4d-f show BC distributions for the *CN455* and *CN445* cases, respectively. The red and green dashed lines have the same meaning as in Fig. S2. Notably, the 4-coordinated Ti ions manifest a more substantial charge localization effect than the 5-coordinated Ti ions. Since the electron clouds for  $V_O$ s in *CN455* or *CN445* cases are more localized to the three neighboring Ti ions than those in the *CN555* case, the presence of other nearby  $V_O$  will barely affect the  $\Sigma BC$  value,

similar to the *CN555* case.

Finally,  $\Sigma\text{BC}$  to ON relationships for the *CN455* and *CN445* cases are calculated, as shown in Fig. S5. Here, all physically feasible IONs which ensure that the electron count of the supercell remains an integer are considered; accordingly, a total of five IONs (0, +0.5, ..., +2) are considered for the *CN455* case, while a total of thirteen IONs (0, +1.67, ..., +2) are considered for the *CN445* case.

### 3. Summary and validation

In summary, the ION of each  $V_O$  is calculated in the following sequences: (1) the BC distribution in the supercell is obtained using the open-source code by the Henkelman group with the default setting;<sup>1</sup> (2) the  $\Sigma\text{BC}$  for each  $V_O$  is calculated. Here, for the compensation of the marginal influence of the delocalized charge, the difference between the average BC of the 6-coordinated Ti ions and the BC of the Ti ion in the perfect rutile  $\text{TiO}_2$  cell is subtracted from the BC values of the 4- or 5-coordinated Ti ions; (3) the ION of each  $V_O$  is calculated via linear interpolation or extrapolation based on the  $\Sigma\text{BC}$  to ON relationship in Fig. S5.

In order to validate the accuracy of the approach, the sum of IONs obtained from our approach is compared with the actual total charge of the supercell, as shown in Table S1. Ideally, these two values should be the same. The approach produced an error of less than 3%, indicating that our approach successfully approximates the IONs. This accuracy suffices for the goal to reveal the tendency of how the IONs change during the switching operation of RRAM.

It should be noted that this methodology relies heavily on both the charge localization nature of  $V_O$  and the high permittivity of rutile  $\text{TiO}_2$ . The exceptionally high

permittivity (over 100) screens the interaction between  $V_{Os}$ , enabling the application of the  $\Sigma BC$  to ON relationship to each  $V_O$  irrespective of the presence of other adjacent  $V_{Os}$ . Accordingly, a sizable error can be involved for materials with relatively lower permittivity, such as  $HfO_2$  and  $Ta_2O_5$ . Conversely, the methodology likely holds for materials with extremely high permittivity, like  $SrTiO_3$ , although thorough verification is necessary.

## Supplementary note 2

### Oxygen ion exchange at Ti/TiO<sub>2</sub> interface

For the simulation of the oxygen ion exchange at the Ti/TiO<sub>2</sub> interface, the interface was constructed by stacking the (10 $\bar{1}$ 0) plane of hexagonal Ti and the (100) plane of rutile TiO<sub>2</sub>, as shown in Fig. S11a. The in-plane lattice mismatches were calculated to be 1.27% and -4.63%. To simulate the oxygen ion exchange reaction at the interface, one oxygen ion was moved from the TiO<sub>2</sub> to an interstitial site in the Ti electrode, as depicted by an orange circle in Fig. S11b. The interstitial site was obtained from Pydefect, an open-source Python package.<sup>6</sup> The climbing NEB (cNEB) calculations were conducted to obtain the energetics and kinetic barrier of the exchange reaction. The cNEB calculations for the Frenkel pair generation in bulk TiO<sub>2</sub> were also conducted for comparison. The images were stabilized until the forces were less than 0.05 eV/Å, and the results are shown in Fig. S12. The energy gain ( $\Delta E$ ) and activation energy ( $E_a$ ) for the Frenkel pair generation in bulk TiO<sub>2</sub> were found to be 5.36 eV, meaning that the formation of V<sub>O</sub>-and-O<sub>i</sub> (interstitial oxygen) pair in bulk TiO<sub>2</sub> is highly unfavorable. In contrast, for oxygen ion exchange at the interface,  $\Delta E$  and  $E_a$  were calculated to be -1.95 eV and 1.01 eV, respectively, suggesting that the exchange reaction is spontaneous ( $\Delta E < 0$ ) and likely to occur due to the relatively low  $E_a$ . Consequently, V<sub>O</sub>s are more readily generated at the interface than in the bulk region.

### Supplementary note 3

#### Influence of interaction between $V_O$ s on $V_O$ formation

To comprehend the influence of interaction between  $V_O$ s on the  $V_O$  formation, a  $V_O$ -pair with a separation distance of 3.88 Å was considered, and the transition level diagram (TLD) for the  $V_O$ -pair was calculated, as shown in Fig. S13. The TLD for an isolated  $V_O$  (identical to Fig. 5b of the main text) is shown together for comparison. The  $V_O^0$ s are preferred near the Ti electrode for both cases, but the formation energy ( $E_f$ ) of the  $V_O^0$ -pair (0.67 eV/ $V_O$ ) is considerably lower than that of an isolated  $V_O^0$  (1.08 eV/ $V_O$ ). (Here, the influence of the Ti/TiO<sub>2</sub> interface was not considered) This finding suggests that the generation of  $V_O^0$ s is facilitated near the existing  $V_O^0$ s. Conversely, a  $V_O^{2+}$ -pair is unstable across all the Fermi level range, implying that an existing  $V_O^{2+}$  suppresses additional generation of  $V_O^{2+}$ s nearby. Therefore,  $V_O^{2+}$ s will be sparsely distributed around the Pt electrode. On the other hand, an isolated  $V_O^{1+}$  is not preferred throughout the Fermi level range, but the  $V_O^{1+}$ -pair becomes predominant in the middle range of  $\epsilon_f$ . It should be noted that, in the middle range of  $\epsilon_f$ , the  $V_O^{1+}$ -pair is energetically more stable than separated  $V_O^0$  and  $V_O^{2+}$ . Hence, the  $V_O^{1+}$ -pair can be formed by pairing the isolated  $V_O^0$  and  $V_O^{2+}$ . These results are consistent with the cohesive energy analyses in Section A of the main text.



## Supplementary Figures

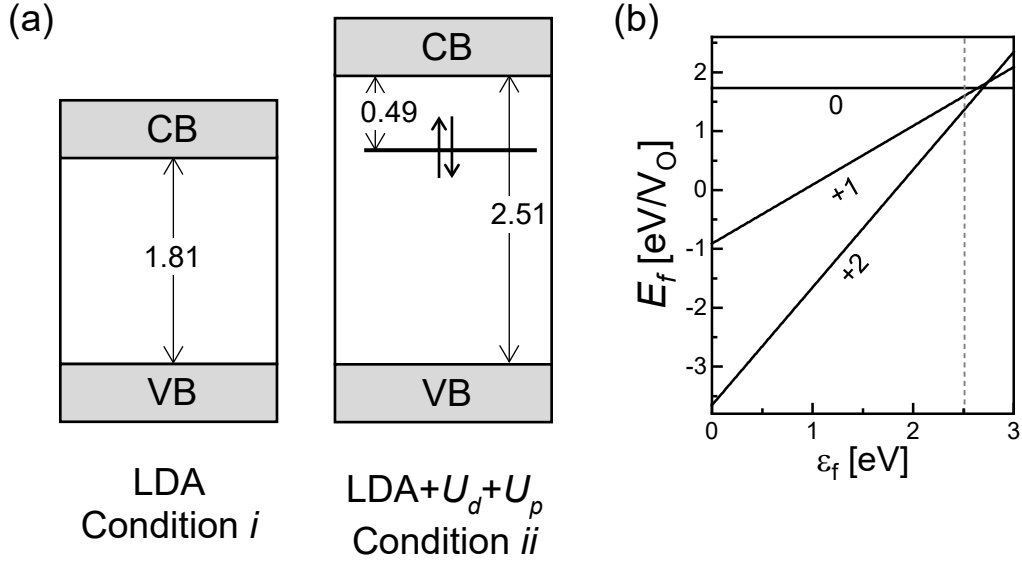

**Fig. S1** (a) Band diagrams of a  $3\times 3\times 6$  rutile  $\text{TiO}_2$  supercell containing one  $\text{V}_0$  obtained by conventional LDA calculation (left panel; condition *i*) and by LDA+ $U_d+U_p$  calculation ( $U_d = 4.0$  eV,  $U_p = 9.0$  eV) (right panel; condition *ii*). The locations of CBM, VBM, and the defect states are sampled at  $\Gamma$ -point based on the fact that  $\text{TiO}_2$  has a direct bandgap of  $\Gamma$  to  $\Gamma$ . The calculated bandgap is 2.51 eV by condition *ii*, which is closer to the experimental bandgap of 3.0 eV than that obtained by condition *i*, 1.81 eV. By condition *ii*, the defect state of  $\text{V}_0^0$  is located at 0.49 eV below the CBM, showing a feasible agreement with an experimental value of 0.7 eV.<sup>2</sup> By condition *i*, no defect state exists within the bandgap. (b) Transition level diagram (TLD) of an isolated  $\text{V}_0$  obtained by the condition *ii*. Note that condition *ii* is set to the previous HSE and DFT+GW studies to ensure accuracy.<sup>3,4</sup> A  $2\times 2\times 3$  rutile supercell is employed, and the chemical potential of an oxygen atom ( $\mu_O$ ) is obtained from the equilibrium condition between  $\text{TiO}_2$  and  $\text{Ti}_2\text{O}_3$ . The  $\mu_O$  in this study, -3.98 eV, is very close to that from the HSE ( $\mu_O = -4.07$  eV) and the DFT+GW ( $\mu_O = -3.99$  eV) studies. The dashed line at  $\epsilon_f = 2.51$  eV indicates the CBM obtained by condition *ii*, but the range of  $\epsilon_f$  was expanded to the experimental band gap (3.0 eV) for comparison. The TLD by condition *ii* also shows feasible agreements with the two previous studies in terms of formation energy ( $E_f$ ). In addition, the y-intercepts ( $\epsilon_f = 0$ ) for  $\text{V}_0^0$ ,  $\text{V}_0^{1+}$ , and  $\text{V}_0^{2+}$  are 1.73 eV, -0.91 eV, and -3.65 eV, respectively, showing agreement with those for the HSE study (1.69 eV, -1.30 eV, and -4.46 eV) and the DFT+GW study (1.82 eV, -0.68 eV, and -3.67 eV). Consequently, condition *ii* provides reliable defect states and the  $E_f$  of  $\text{V}_0^{q+}$ , which are crucial in this study.

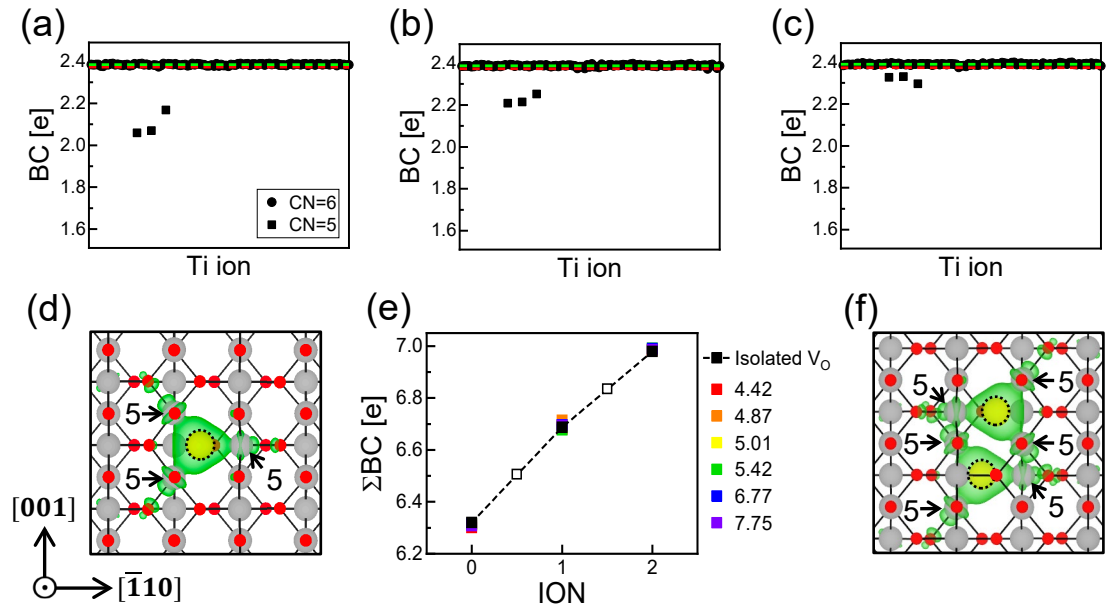

**Fig. S2** Bader charge (BC) distributions on Ti ions when an isolated (a)  $V_0^0$ , (b)  $V_0^{1+}$ , and (c)  $V_0^{2+}$  exists in a  $3 \times 3 \times 6$  rutile  $TiO_2$  supercell, respectively. The x-axes indicate Ti ions in the  $3 \times 3 \times 6$  rutile  $TiO_2$  supercell. The red dashed lines represent the BC value of the Ti ion in perfect rutile  $TiO_2$ , while the green dashed lines represent the average BC value of the 6-coordinated Ti ions in each case. (d) Electron cloud (partial charge density diagram for the defect states) for an isolated  $V_0^0$  (isosurface =  $0.005 \text{ e}/\text{\AA}$ ). The 5-coordinated Ti atoms are indicated by the arrows. (e) Changes in  $\sum BC$  according to ION when an isolated  $V_0^{q+}$  ( $q = 0, +1, +2$ ) exists (black squares) and when two  $V_0^{q+}$ s exist at a certain distance from each other (colored squares). The open squares for IONs of +0.5 and +1.5 also show the relationship between  $\sum BC$  and ON. (f) Electron clouds for two  $V_0^0$ s with a distance of  $4.42 \text{ \AA}$  (isosurface =  $0.005 \text{ e}/\text{\AA}$ ). The 5-coordinated Ti ions are indicated by the arrows. For (d) and (f), the grey, red, and yellow circles indicate Ti, O, and  $V_0$ , respectively, and this color notation is maintained throughout this study.

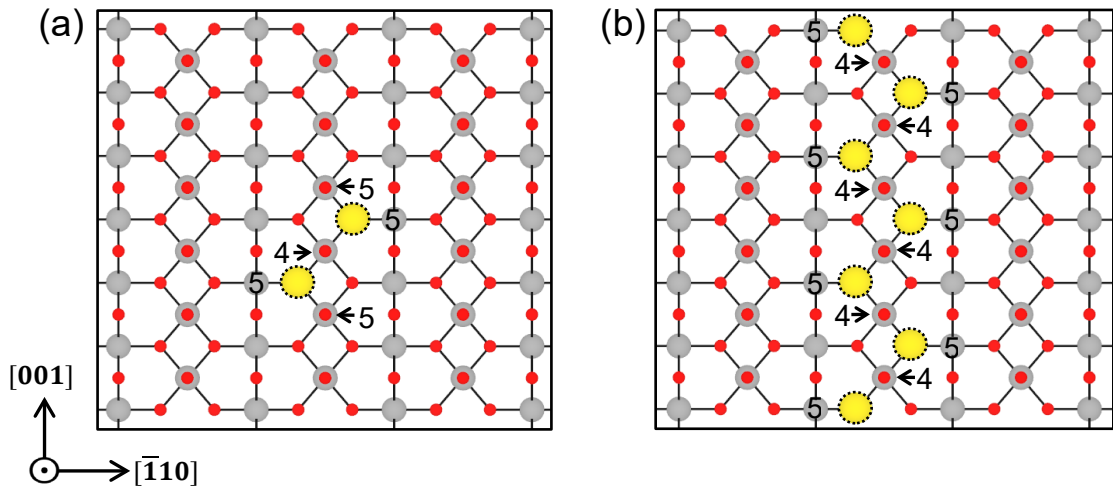

**Fig. S3** (a) Atomic structure of the supercell employed for the *CN455* case. Two  $V_O$ s are located at the diagonal sites of the equatorial plane of the Ti-O octahedron with a distance of 3.88 Å. (b) Atomic structure of the supercell employed for the *CN445* case, which is the CF structure in this study. The numbers indicate the CN of each Ti ion. Note that the  $V_O$ -sites within these two supercells are symmetrically equivalent, so the IONs of  $V_O$ s should be the same.

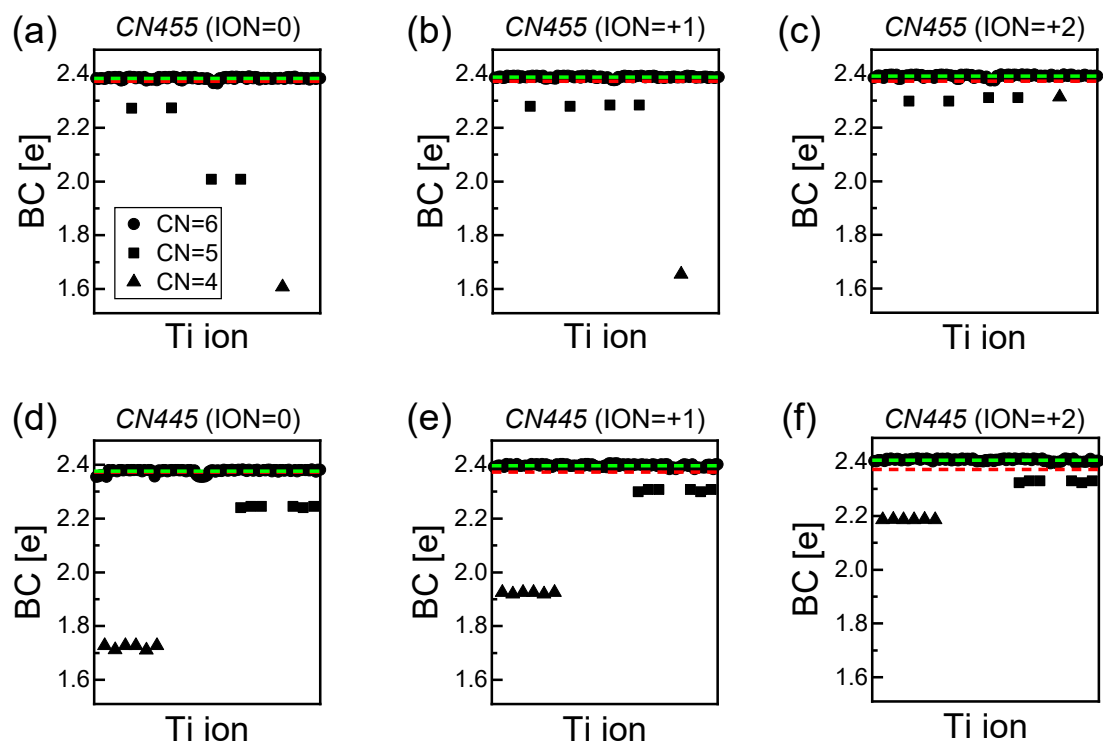

**Fig. S4** BC distribution for the *CN455* when the IONs of  $V_{O_s}$  are (a) 0, (b) +1, and (c) +2. BC distribution for the *CN445* when the IONs of  $V_{O_s}$  are (d) 0, (e) +1, and (f) +2. The red dashed line represents the BC value of the Ti ion in perfect rutile  $TiO_2$ , while the green dashed line represents the average BC value of the 6-coordinated Ti ions in each case. The x-axes indicate Ti ions in the  $3 \times 3 \times 6$  rutile  $TiO_2$  supercell.

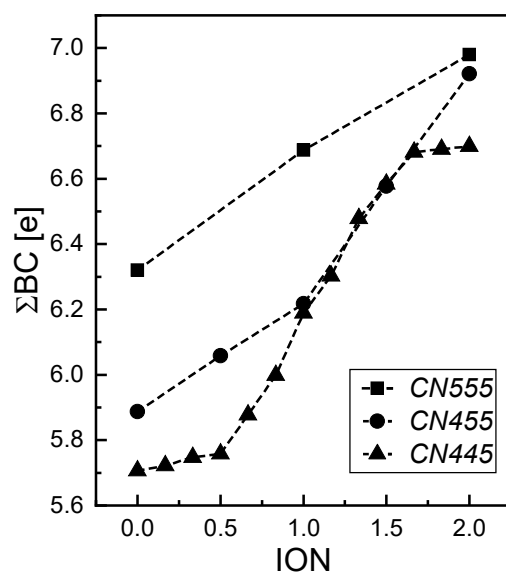

**Fig. S5**  $\Sigma$ BC to ION relationship according to the CNs of the three adjacent Ti atoms.

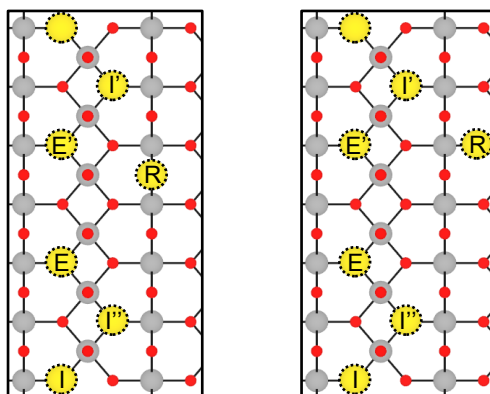

**Fig. S6** Schematic illustration of the labels in Table S1. The topmost  $V_0$  is the same as the bottom  $V_0$  marked by 'I' due to the periodic boundary condition.

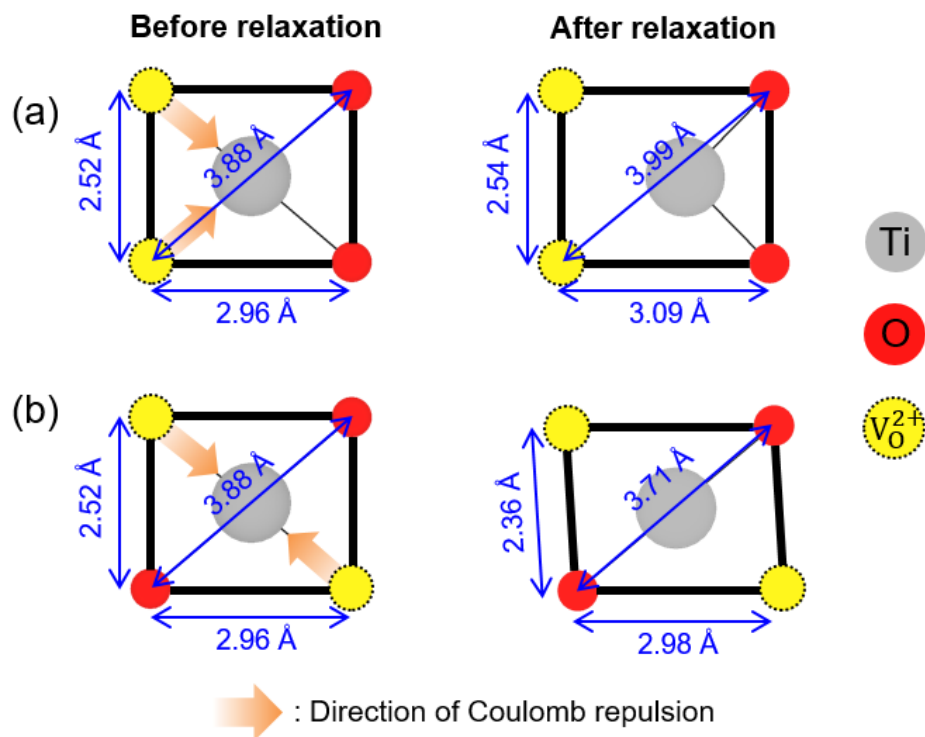

**Fig. S7** Equatorial planes of Ti-O octahedra before and after relaxation when two  $V_0^{2+}$ s are separated by (a) 2.52 Å and (b) 3.88 Å. The solid rectangle and dashed lines indicate the equatorial plane and the vertical axis of the Ti-O octahedron, respectively. In (a), the central Ti ion can readily move away from the  $V_0^{2+}$ s in the direction of the vector sum of two Coulomb repulsions. In (b), on the contrary, two symmetric Coulomb repulsions cancel out, hindering the central Ti ion from being sufficiently displacing.

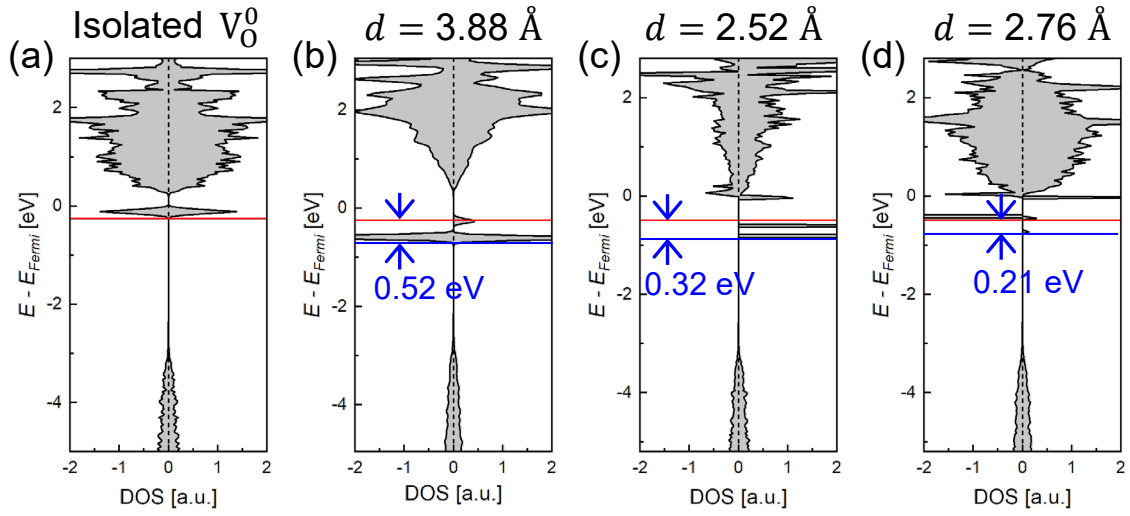

**Fig. S8** (a) Atom-resolved electronic density of states (DOS) obtained by projection onto a 5-coordinated Ti ion (Ti ion adjacent to  $V_O^0$ ) when the supercell contains an isolated  $V_O^0$ . The defect state is 0.49 eV below CBM, as shown in Fig. S1. Atom-resolved DOSs obtained by projection onto the 4-coordinated Ti ion when the supercell contains two  $V_O^0$ s separated by (b) 3.88 Å, (c) 2.52 Å, and (d) 2.76 Å, respectively. In (b), the defect states are the deepest, resulting in the minimum of the  $E_{coh}$ . In (d), the deepest defect state is 0.21 eV deeper than those induced by an isolated  $V_O^0$ , but its magnitude of DOS is negligible. On the other hand, its second deepest defect state, showing the largest magnitude of DOS, has almost the same depth as the defect states induced by an isolated  $V_O^0$ , resulting in nearly zero  $E_{coh}$ , as shown in Fig. 2a of the main text.



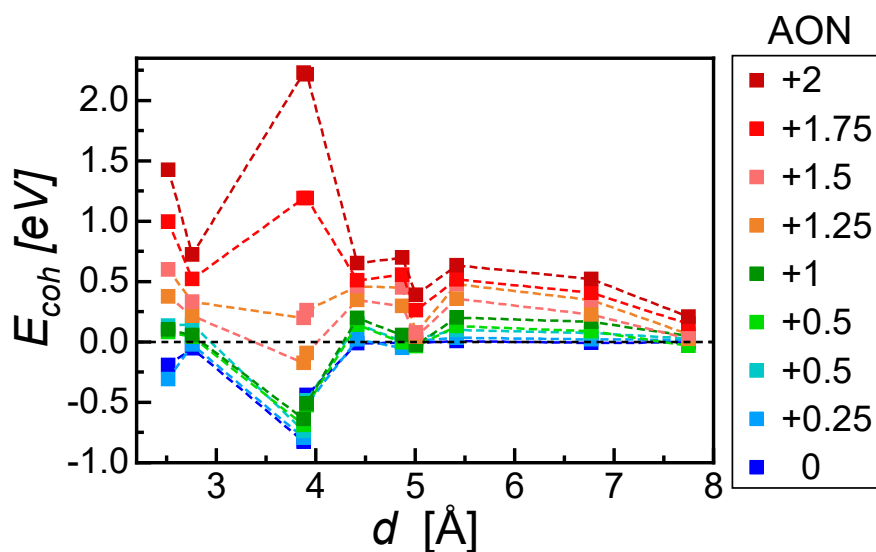

**Fig. S9**  $E_{coh}$  as a function of the distance between two  $V_0^{q+}$  s, considering fractional oxidation number. Although the AONs of +0.25, +0.75, +1.25, and +1.75 are infeasible since the number of electrons contained in the supercell is not an integer, they are taken into account to ensure the trend in  $E_{coh}$  according to the oxidation number. The AONs ranging from 0 to +1 show similar attractive  $E_{coh}$  trends, while the AONs exceeding +1 exhibit significant increases in  $E_{coh}$ , especially at distances of 3.88 Å and 3.91 Å.

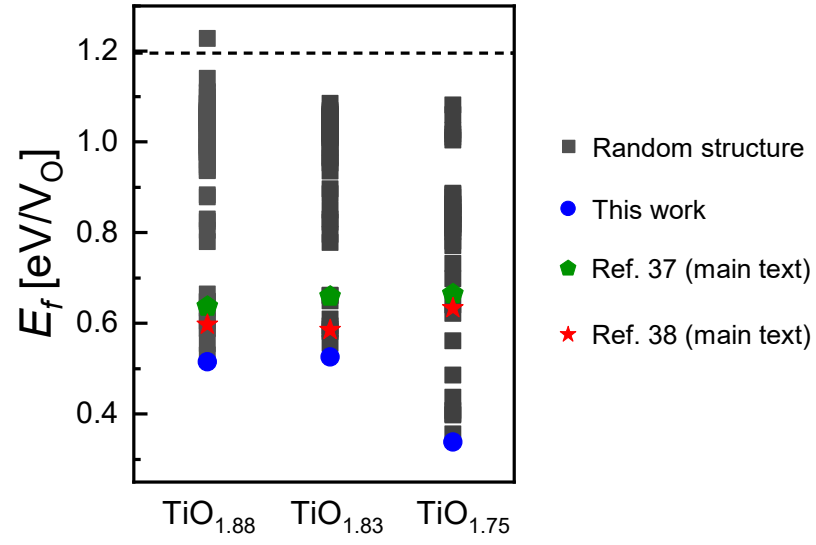

**Fig. S10**  $E_f$  distributions for various configurations in three compositions of  $\text{TiO}_{1.88}$ ,  $\text{TiO}_{1.83}$ , and  $\text{TiO}_{1.75}$ , including two CF structures previously suggested (green pentagons and red stars) for the AON of 0. The dashed lines indicate the  $E_f$  of an isolated  $\text{V}_\text{O}^0$ . See Table S2 for information on the random structures employed in these calculations.

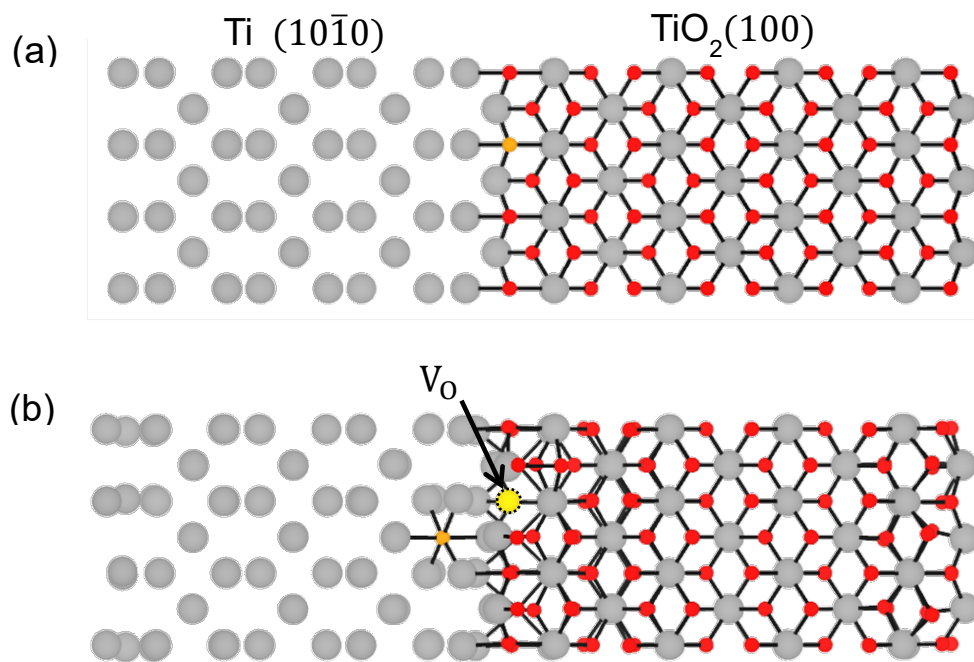

**Fig. S11** Atomic structures of the Ti/TiO<sub>2</sub> interface. (a) clean and (b) after oxygen ion exchange. The grey and red circles represent the Ti ions and O ions, respectively. The moving oxygen ion is represented by an orange circle. The dotted yellow circle indicates the generated oxygen vacancy due to the exchange.

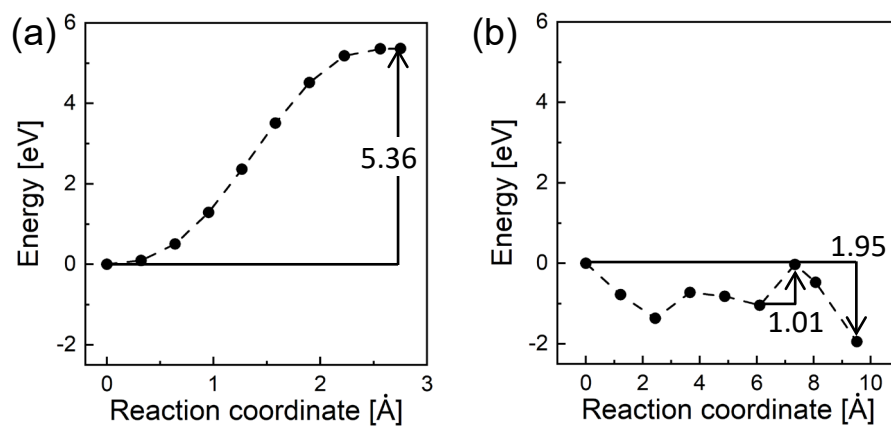

**Fig. S12** Energy gain ( $\Delta E$ ) and activation energy ( $E_a$ ) for (a) Frenkel pair generation and (b) oxygen ion exchange at the Ti/TiO<sub>2</sub> interface.

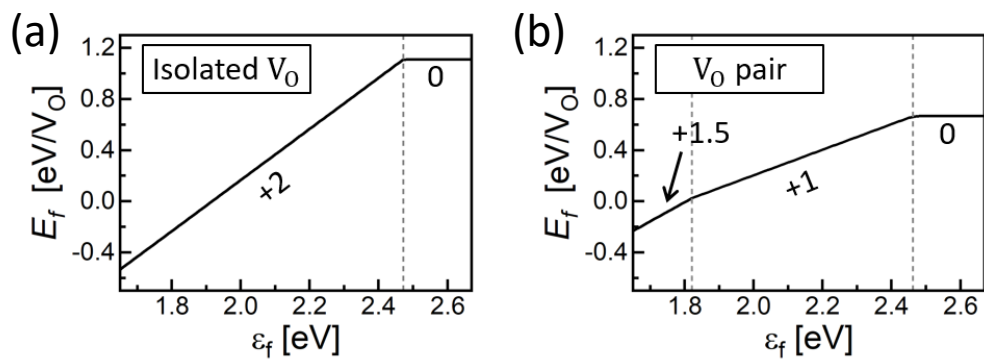

**Fig. S13** TLDs for (a) an isolated  $V_O$  and (b) a  $V_O$ -pair (right panel). The x-axes represent the Fermi level with respect to the valance band maximum of  $TiO_2$ . The left and right ends of the x-axes correspond to the region near the Pt electrode and the Ti electrode, respectively. The numbers indicate the preferred average oxidation number (AON) of  $V_O$ s.

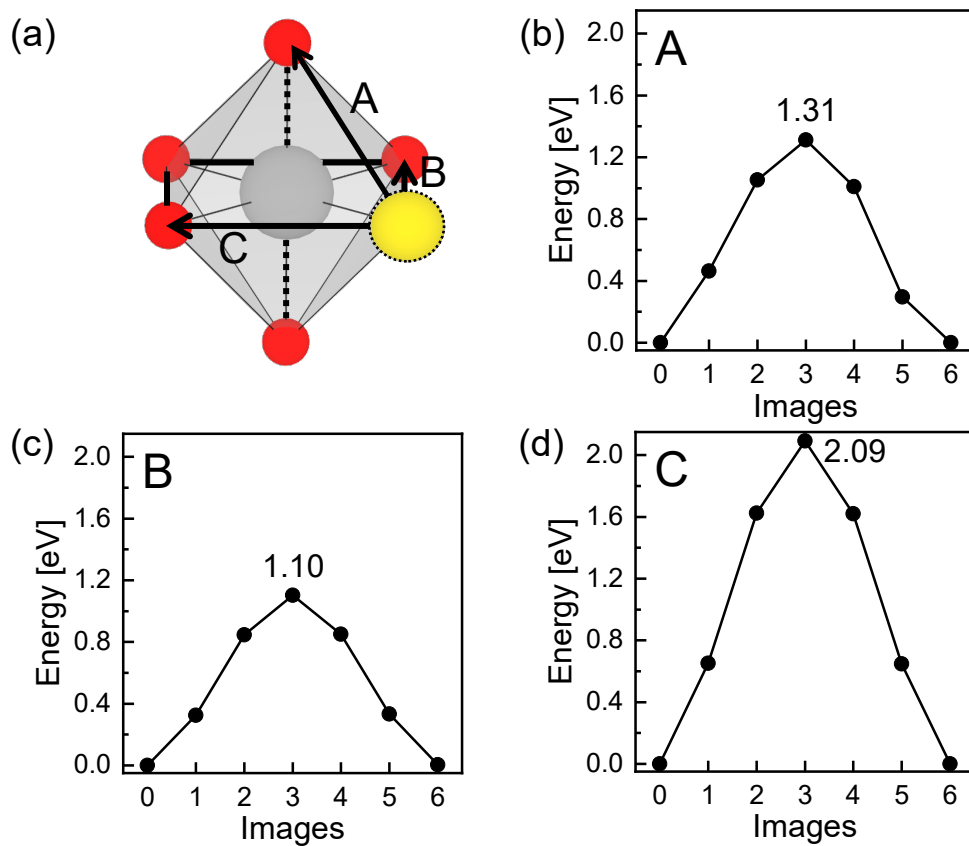

**Fig. S14** (a) Atomic structure of the Ti-O octahedron. Three paths of  $V_0^{2+}$  diffusion are denoted by A, B, and C. The bold lines and dashed lines represent the equatorial plane and the vertical axis of the Ti-O octahedron, respectively. The length of each path is the same as Fig. 2b of the main text. The cNEB profiles for (b) path A, (c) path B, and (d) path C, respectively. Although path B exhibits the lowest activation barrier, the motion of the  $V_0^{2+}$  is confined to one edge of the Ti-O octahedron if only path B is considered. Furthermore, path C can be divided into two sequential paths of A. Consequently, the diffusion barrier of  $V_0^{2+}$  is 1.31 eV.

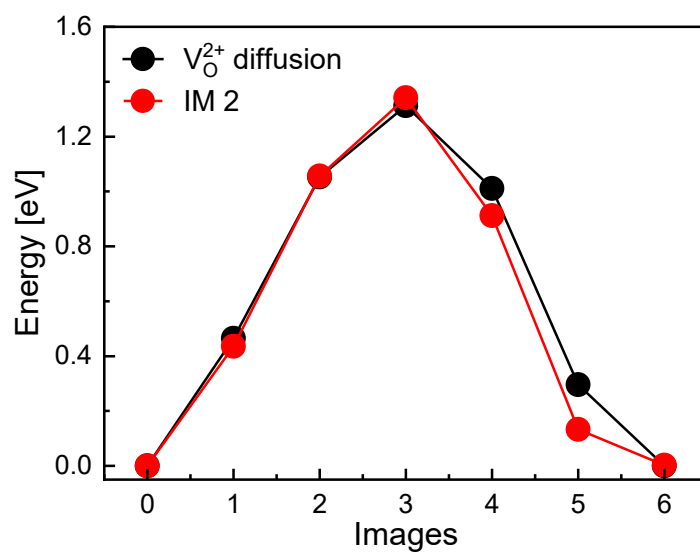

**Fig. S15** Comparison of the cNEB profiles for the IM 2 and the  $V_O^{2+}$  diffusion.

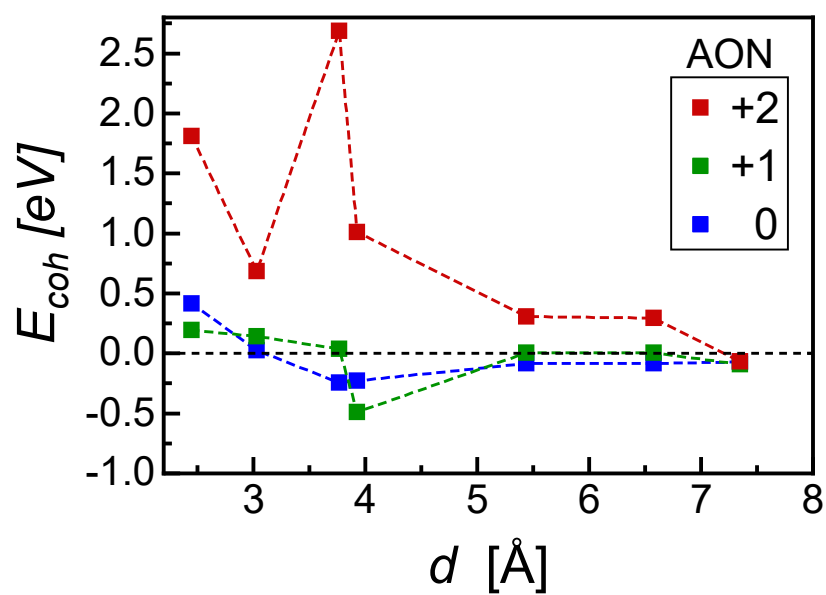

**Fig. S16**  $E_{coh}$  as a function of the distance between two  $V_0^{q+}$ s anatase  $TiO_2$ , showing a similar tendency with rutile  $TiO_2$  in Fig. 2a.



## Supplementary Tables

**Table S1** Estimated IONs of  $V_{OS}$  for the processes described in Section C of the main text. See Fig. S6 for a description of the labels. The errors are calculated by comparing the calculated total ON and the actual total charge of the supercell.

| Process             |       | IM 1 (+1.33) |       | IM 2 (+1.33) |       | IM 1 (+1.17) |       | IM 2 (+1.17) |       | e <sup>-</sup> -injection |       |
|---------------------|-------|--------------|-------|--------------|-------|--------------|-------|--------------|-------|---------------------------|-------|
| Label               | Case  | $\Sigma$ BC  | ION   | $\Sigma$ BC               | ION   |
| I'                  | CN445 | 6.20         | +1.01 | 6.23         | +1.06 | 5.89         | +0.69 | 5.97         | +0.80 | 5.82                      | +0.59 |
| E'                  | CN455 | 6.61         | +1.55 | 6.55         | +1.47 | 6.25         | +1.04 | 6.19         | +0.90 | 6.20                      | +0.95 |
| R                   | CN555 | 6.99         | +2.03 | 7.00         | +2.07 | 6.99         | +2.02 | 7.00         | +2.07 | 6.70                      | +1.03 |
| E                   | CN455 | 6.57         | +1.49 | 6.60         | +1.53 | 6.58         | +1.51 | 6.59         | +1.52 | 6.20                      | +0.95 |
| I''                 | CN445 | 6.14         | +0.95 | 6.19         | +1.00 | 6.15         | +0.97 | 6.17         | +0.98 | 5.84                      | +0.62 |
| I                   | CN445 | 6.11         | +0.93 | 6.15         | +0.96 | 6.04         | +0.87 | 5.97         | +0.80 | 6.02                      | +0.86 |
| Total ON            |       | +7.96        |       | +8.09        |       | +7.09        |       | +7.20        |       | +4.99                     |       |
| Actual total charge |       | +8           |       | +8           |       | +7           |       | +7           |       | +5                        |       |
| Error [%]           |       | <b>-0.5</b>  |       | <b>1.2</b>   |       | <b>1.3</b>   |       | <b>2.9</b>   |       | <b>-0.1</b>               |       |

**Table S2** Detailed information on supercells employed for Fig. S10. All symmetrically different structures are considered by DBmaker in Lattice Configuration Simulation (LACOS) package.<sup>5</sup>

| Composition         |             | Supercells                                                                    | Number of structures |
|---------------------|-------------|-------------------------------------------------------------------------------|----------------------|
| TiO <sub>1.88</sub> | 16 Ti, 30 O | 1×1×8, 2×1×4, 2×2×2, 4×1×2, 4×2×1, 8×1×1, $\sqrt{2} \times \sqrt{2} \times 4$ | 120                  |
| TiO <sub>1.83</sub> | 12 Ti, 22 O | 1×1×6, 2×1×3, 2×3×1, 3×1×2, 6×1×1, $\sqrt{2} \times \sqrt{2} \times 3$        | 71                   |
| TiO <sub>1.75</sub> | 8 Ti, 14 O  | 1×1×4, 1×2×2, 2×2×1, 4×1×1, $\sqrt{2} \times \sqrt{2} \times 2$               | 44                   |
| Total number        |             |                                                                               | 235                  |

## References

1. G. Henkelman, A. Arnaldsson and H. Jónsson, *Comput. Mater. Sci.* 2006, **36**, 354.
2. V. E. Herich, G. Dresselhaus and H. J. Zeiger, *Phys. Rev. Lett.* 1976, **36**, 1335.
3. A. Janotti, J. B. Varley, P. Rinke, N. Umezawa, G. Kresse and C. G. Van de Walle, *Phys. Rev. B* 2010, **81**, 0852121.
4. A. Malashevich, M. Jain and S. G. Louie, *Phys. Rev. B* 2014, **89**, 075205.
5. M. Chandran, *Comput. Mater. Sci.* 2015, **108**, 192–204.
6. Yu Kumagai, Naoki Tsunoda, Akira Takahashi, and Fumiyasu Oba, *Phys. Rev. Materials* 2021, **5**, 123803.
